# Supplementary material for: The effect of “Jelly” CdTe QD uptake on RAW264.7 monocytes: immune responses and cell fate study
Source: Royal Society of Chemistry journal article supplement (doi:10.1039/c5tx00153f), 2015-10-13
Supplement: c5tx00153f1.pdf [file c5tx00153f1.pdf]

## Supplementary Information

Table 1. P-values of all experimental data

| Name      | p-value         |                 |                  |                  |                |
|-----------|-----------------|-----------------|------------------|------------------|----------------|
|           | CD80 expression | CD86 expression | Uptake, 12 hours | Uptake, 24 hours | PicoGreen test |
| Green Gel |                 |                 |                  |                  |                |
| 1 nM      | 0.1374          | 0.2772          | 0.8718           | 0.1462           | 0.8777         |
| 10 nM     | 0.7134          | 0.6092          | 0.2941           | 0.0054           | 0.258          |
| 100 nM    | 0.0426          | 0.0007          | 0.0001           | 0.0001           | 0.0004         |
| Red Gel   |                 |                 |                  |                  |                |
| 1 nM      | 0.1653          | 0.0002          | 0.6227           | 0.3587           | 0.9001         |
| 10 nM     | 0.0531          | 0.0083          | 0.9621           | 0.4789           | 0.7864         |
| 100 nM    | 0.002           | 0.003           | 0.0001           | 0.0001           | 0.0006         |

TEM images of cells treated with 100 nM QDs for 24 hours

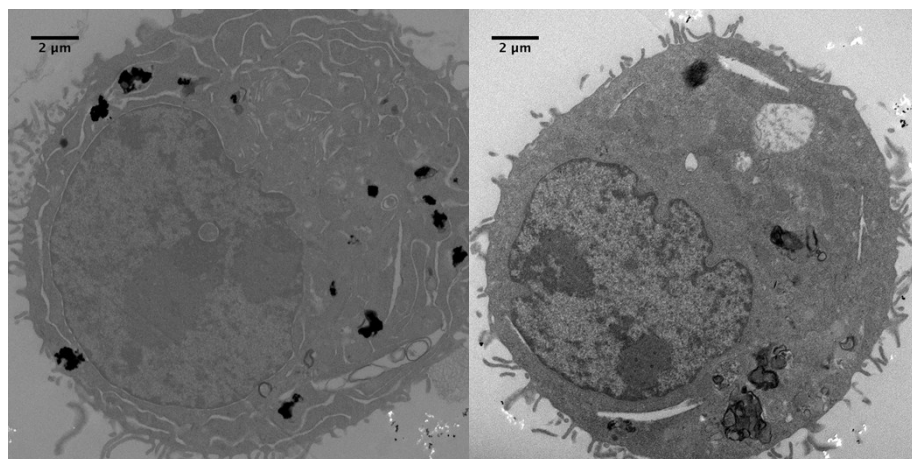

RAW264.7 cells treated with 100 nM green TGA-gelatin covered QDs for 24 hours

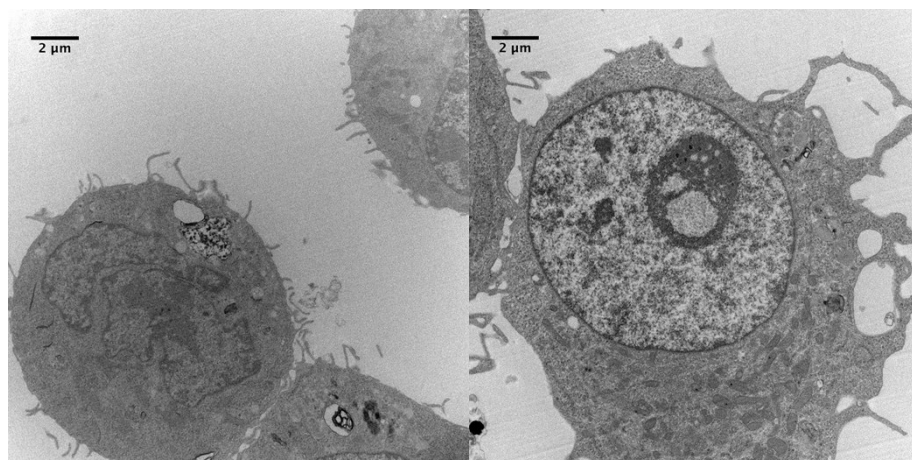

RAW264.7 cells treated with 100 nM red TGA-gelatin covered QDs for 24 hours
